# Supplementary material
Source: PubMed Central journal article supplement (PMC2259085)
Supplement: plntphys_pp.107.114066_1.pdf [file plntphys_pp.107.114066_1.pdf]

**Supplemental Table S1.** Primers used for quantification of mRNAs from common bean nodules by qRT-PCR

| Gene             | Identifier       | Forward                | Reverse               |
|------------------|------------------|------------------------|-----------------------|
| <i>Ubiquitin</i> | U77940           | GCTTCGTGGTGGAAATGCAGAT | TCGCACCTTGGCAGACTACAA |
| <i>GMP</i>       | TC466            | AGCTGCACAATAATGCGAGGA  | TCCACTCGAGACCATTGACCA |
| <i>GME</i>       | TC410            | CTTTGGAATTGAGTGCCGCA   | TCTTCCGGCAAAAATGCAGC  |
| <i>GalPP</i>     | CV538392         | CTGGAATCCGTGGAAAAGGTG  | TGTTCCAATCTCTGTGGCGAG |
| <i>GalDH</i>     | TC2872           | CGATTGATGTGGTGCTTTCGT  | GGAGAAGCATTGATGATGGCA |
| <i>GalLDH</i>    | --- <sup>a</sup> | GCAAAGCCAAGCATGAAAAGAC | ATTGGGCAGCGATGGACAT   |
| <i>γECS</i>      | AF128454         | AGCTGTGTCCCACCGAGTG    | AAGAGTGAGCGGAGGAGGGT  |
| <i>hGSHS</i>     | AF258320         | AGTTCAGGTGTGGGTTTGG    | GGCCCGGGTAATAAGCAAAG  |
| <i>DR1</i>       | CB539361         | CAATGTCTTCCGTTCCCCCT   | AGCTTTAACGGCGATTTCGA  |
| <i>DR2</i>       | TC2364           | GCAACAAACCCGAATGGTTT   | ACGGGCACCTTTCCTTCAG   |
| <i>AO</i>        | Pv_ERRI_26       | CAGGAGTTTGGGCCTTCCAT   | TTCCCATGTGCAAATGTGGT  |

<sup>a</sup> Primers (5' →3') were designed based on a partial sequence obtained from a bean nodule cDNA as indicated in the Materials and Methods.
